# Supplementary material for: The role of land-atmosphere coupling in subseasonal surface air temperature prediction
Source: Copernicus journal article supplement (doi:10.5194/egusphere-2024-2312), 2024-08-30
Supplement: Supplementary file [file egusphere-2024-2312-AC2-supplement.pdf]

## General comments

The authors present a thorough evaluation of land-atmosphere (L-A) coupling and its influence on subseasonal-to-seasonal (S2S) predictability, specifically focusing on surface air temperature (T2m). They assess the coupling processes by calculating correlations that capture the interactions between land conditions and surface fluxes, as well as between surface fluxes and the overlying atmosphere or boundary layer. The study analyzes 414 forecast dates using Version 2 of NASA's advanced GEOS S2S analysis and forecast system, with comparisons to ERA5 and MERRA2 reanalyses. The authors effectively emphasize the importance of understanding L-A coupling strength for enhancing forecast skill, especially for "forecasts of opportunity" across the continental U.S.

Your study provides valuable insights into the role of strong L-A coupling for enhancing surface air temperature prediction on subseasonal-to-seasonal timescales. One area that could enrich this research further would be an exploration of how this coupling influences the predictability of specific extreme events, such as heatwaves and soil moisture droughts, or their compound occurrences. Understanding these interactions could provide additional context for the societal and ecological impacts of such events and improve risk management strategies. Do you see potential in integrating analyses of compound heatwave-drought events with your L-A coupling framework to advance this aspect?

⇒ We agree with the reviewer's comment in terms of the broader potential applicability and impact of the study and approach. The focus of the current study is on the impact of L-A coupling on prediction skill of T2m as a whole, rather than on the prediction skill of individual extreme events that comprise a subset of this bulk analysis. In response to the reviewer's suggestion, we have added a discussion on the potential utility of this approach for improving forecasts of opportunity for extreme events. However, an actual examination of extreme events is beyond the scope of this study.

## Specific Comments

### Title

The current title, "The role of land-atmosphere coupling in subseasonal surface air temperature prediction," could be refined to better reflect the study's specific focus. I suggest including the geographic focus and indicating the use of the GEOS-S2S-2 model and reanalysis data for increased specificity.

⇒ Following the reviewer's comment, we have included the geographic focus in the title to enhance clarity. The revised title is now: "The role of land-atmosphere coupling in subseasonal surface air temperature prediction across the contiguous United States."

### Introduction

1. The introduction could benefit from integrating recent studies that highlight how the development of compound drought-heatwave events is influenced by distinct land-atmosphere (L-A) coupling behaviors associated with water and energy limitation regimes in various U.S. regions. For instance, the work by Yoon et al. (2024) emphasizes how L-A coupling significantly shaped the 2022 compound drought-heatwave events in the contiguous United States (CONUS). Incorporating these findings could provide context on how specific L-A coupling dynamics contribute to such extreme events and enhance the relevance of your study's focus on prediction skill. This perspective would enrich the discussion by linking L-A coupling to practical forecasting challenges and implications.

⇒ Thank you for your suggestion. Our focus is on the impact of L-A coupling on prediction skill of T2m rather than on the prediction skill of specific extreme events. Therefore, instead of adding such

discussion to the introduction, we have included at lines 301-305 a discussion about the potential relevance of our approach to predicting extreme events. This also addresses the reviewer's comment 4 below in the Summary and Discussion section. The new text is as follows:

“Although Fig. 5 clearly shows that strong L-A coupling during summer in the contiguous U.S. was associated with warm anomalies, we do not directly analyze extreme events here. The L-A coupling is recognized as one of the key mechanisms driving extreme event such as heat waves and drought (e.g., Seneviratne et al. 2010). For instance, the 2012 drought in the Midwest (Roy et al. 2019) and 2022 heatwave-drought in the Great Plains (Yoon et al. 2024) were affected by the L-A coupling. Our coupling strength-based approach may help identify forecasts of opportunity for such events.”

## Data and Methods

1. **Geographical Focus:** While the study seems to focus on the continental U.S., explicitly stating this in the Data and Methods section would help clarify the study's regional scope for readers.

⇒ We have added a sentence to clarify the geographic focus in introduction at line 52 as shown below:

“The analysis focuses on the contiguous United States, which contains a well-known hotspot of L-A coupling (e.g., Koster et al. 2006).”

2. **Model and Data Source Clarity:** The authors use the NASA GEOS-S2S model from 1999 to 2022 and compare its outputs to ERA5 and MERRA2 reanalyses. It would be beneficial if the authors could specify the strengths and limitations of each reanalysis data source in the context of L-A coupling.

⇒ The advantage of using MERRA-2 as reference data is its ability to account for the data assimilation effect, as noted in lines 181-185. However, MERRA-2 incorporates no surface temperature information over land during the data assimilation process. We mentioned this in the manuscript, but we revised the manuscript on lines 173-179 to clarify this point, as shown below.

“The spatial distribution of GEOS-S2S-2 is understandably more similar to that of MERRA-2, as both are based on the same modeling system (Molod et al. 2020). The asymmetry between the western and eastern U.S. is somewhat more pronounced in ERA5 compared to GEOS-S2S-2 and MERRA-2. As mentioned earlier, the data assimilation process used in the production of ERA5 incorporated substantial amounts of T2m information from ground stations. Furthermore, ERA5 is based on higher spatial resolution: ERA5 data are provided at approximately 25 km horizontal resolution, whereas MERRA-2 provides at 50 km. This difference may contribute to variations in simulating boundary layer conditions and land-atmosphere coupling. Nevertheless, using MERRA-2 is still valuable for examining the sensitivity of the results to the choice of reanalysis data.”

3. **Forecast Initialization Skill (Lines 52-54):** The paper emphasizes forecasts of coupling components rather than initialization. Including a brief analysis of GEOS-S2S forecast skill compared to reanalysis data specifically for weeks 3-4 could be valuable for readers assessing the model's performance.

⇒ We do not fully understand the reviewer's suggestion. If the reviewer is asking us to provide the prediction skill of T2m, we have already presented it in Fig. 2a. However, if the reviewer is requesting the prediction skill of coupling indices, this is challenging to address due to the influence of data assimilation. As mentioned in lines 181-183, the data assimilation process disrupts L-A coupling, suppressing or enhancing the physical correlations in the reanalysis data. In response to reviewer, we have expanded this point at lines 298-300 in the discussion section as shown below:

“However, evaluating the L-A coupling strength is challenging because the reanalysis data is influenced by the data assimilation process, which may suppress (or enhance) the L-A coupling processes modeled in the system. Long-term observational data would be needed to better evaluate the simulation and forecasting of L-A coupling.”

4. **Order Consistency:** In the Methods section, the authors first introduce the Anomaly Correlation Coefficient (ACC) before discussing L-A coupling metrics. However, this order is not followed in the Results section. For consistency and readability, aligning the order in both sections would be beneficial.

⇒ We have switched the order of Sections 2.3 and 2.4 as the reviewer suggested.

## Results

1. **Figure 1 (a-c):** The spatial similarity between GEOS-S2S and the two reanalyses is noteworthy. Expanding on these similarities in the discussion would strengthen the analysis and provide further context for the comparison.

⇒ We believe that the spatial similarity has already been described in detail in lines 151-166. While we are unsure if we have fully understood the reviewer’s suggestion, we now revisit this point in the discussion section at line 297:

“It is noteworthy that GEOS-S2S-2 exhibits spatially similar pattern in the L-A coupling indices with the two reanalyses (Fig. 1).”

1. **Figure 1 (d-e):** The correlation between latent heat flux (LH) and surface skin temperature (TS) appears stronger in ERA5 than in GEOS-S2S in the western U.S. Providing an explanation for this difference could offer insights into the model’s performance in capturing regional variations.

⇒ Thank you for the suggestion. The additional text on lines 173-179 to address this reviewer’s comment 2 in Data and Methods section provides a partial answer to this question. As to the explanation, while we cannot be certain, we speculate that it may be due to data assimilation or differences in the land model. Specifically, ERA5 assimilates 2m T and q, and uses this information to nudge soil moisture in order to influence the surface fluxes and energy balance to better match the 2m observations. This creates a tight link and constraint on the surface based on the 2m observations that the other models and reanalyses do not enforce.

2. **Figure 1 (g-i):** The spatial pattern for the correlation between LH and LCLd in GEOS-S2S appears more similar to that of MERRA2. The authors could address the inconsistencies observed when comparing GEOS-S2S with the two reanalyses in Figures 1(d-e) and (g-i) to enhance the interpretation of these results.

⇒ Yes. The spatial pattern in GEOS-S2S-2 is more similar to that of MERRA-2 because they utilize a fundamentally similar model and physical parameterizations (Molod et al. 2020). This is pointed out in the new text at lines 173 forward, as discussed in the responses to earlier comments. We also mention in that new text that the inconsistencies seen when comparing GEOS-S2S-2 with the ERA5 may stem from the assimilation in the latter of T2m data.

## Summary and Discussion

1. **Multimodel Comparison:** While the study provides useful insights based on the GEOS-S2S model, the results could be more generalizable if tested across multiple models. I agree with the authors' suggestion for a multimodel intercomparison using S2S project data or SubX data, which could broaden the understanding of L-A coupling impacts across diverse geographical and seasonal contexts.

⇒ Thank you for agreeing to it. We will examine it in the next study.

2. **Biases in Seasonal Models:** The authors mention the presence of systematic warm and dry biases in certain seasonal prediction models over the central U.S. (e.g., Klein et al., 2006; Ardilouze et al., 2019). Expanding the discussion on how these biases may impact L-A coupling strength and forecast skill could provide additional context and depth.

⇒ The study of Koster et al. (2021), found, for example, that the bias has a distinctively different impact in wet and dry regimes, highlighting the complexities of the bias and so its potential impact on skill. The impacts on our results will need to be investigated further in future studies. We have added this discussion point at line 315:

“Additionally, seasonal prediction models have exhibited systematically warm and dry biases over the central U.S. (Klein et al., 2006; Ardilouze et al., 2019). The impacts of such biases on forecast skill are complex; Koster et al. (2021), for example, found that a precipitation bias has a distinctly different impact if the soil starts out anomalously wet rather than anomalously dry. The impacts of such biases on L-A coupling will need to be further investigated in future studies.”

3. **Ensemble Size and Forecast Frequency:** Previous studies indicate that increasing forecast frequency can enhance S2S forecast accuracy. Similarly, expanding ensemble size may better capture subtle shifts in forecast probabilities (e.g., see ECMWF newsletter 173). Including a discussion on the potential impacts of ensemble size and forecast frequency would add depth and highlight possible avenues for future studies.

⇒ Thank you for suggesting it. It is helpful in improving our discussion. We acknowledge the importance of a larger number of ensemble size, which under certain conditions contributes to improved forecast skill. It is worth examining this in the future, and we have added the following discussion at lines 311-314:

“There are various ways to construct the ensemble size for subseasonal forecasts. As the ensemble size increases, the prediction skill tends to improve (Buizza and Palmer, 1999; Vitart and Takaya, 2021). It is also valuable to examine how such adjustments to ensemble size affect the influence of the L-A coupling strength on prediction skill. We plan to investigate this further with GEOS-S2S-3, which features a larger ensemble size.”

4. **Incorporating Examples of Extreme Events:** Integrating specific examples, such as the 2011 Southern Plains Drought and Heatwave, the 2012 Central U.S. Drought and Heatwave, and the 2020–2022 Western U.S. Megadrought and associated heatwaves, would contextualize the role of L-A coupling dynamics in extreme events. These cases illustrate the compound impacts of heat and drought and how L-A coupling can amplify such conditions. **Addressing these examples could enhance the relevance of the study by connecting findings to real-world events. Additionally, discussing these interactions in the 'Discussion and Conclusions' section would provide insights into how future research could explore these dynamics to improve forecasting for compound events.**

⇒ Thank you for the suggestion. We have addressed this in the revised manuscript (lines 301-305) as outlined in our response to the previous comment related to the Introduction.
